# Supplementary material
Source: Springer Nature journal article supplement (https://www.springermedizin.de/resource/supplementary/12943_2009_609_MOESM2_ESM.pdf/9555106)

## Tumor incidence of alb-myc<sup>tg</sup> mice

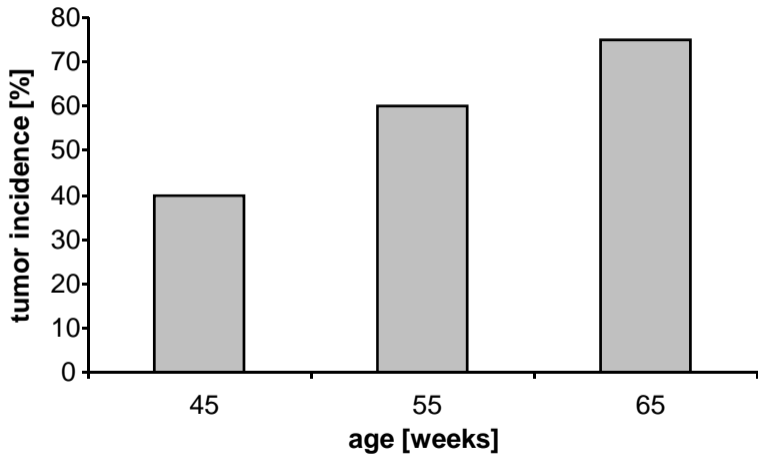

Supplement: MOESM2 [file 9555106]
